# Supplementary material for: Continuous map of early hematopoietic stem cell differentiation across human lifetime
Source: Springer Nature journal article supplement (doi:10.1038/s41467-025-57096-y), 2025-03-07
Supplement: MOESM1 [file 41467_2025_57096_MOESM1_ESM.pdf]

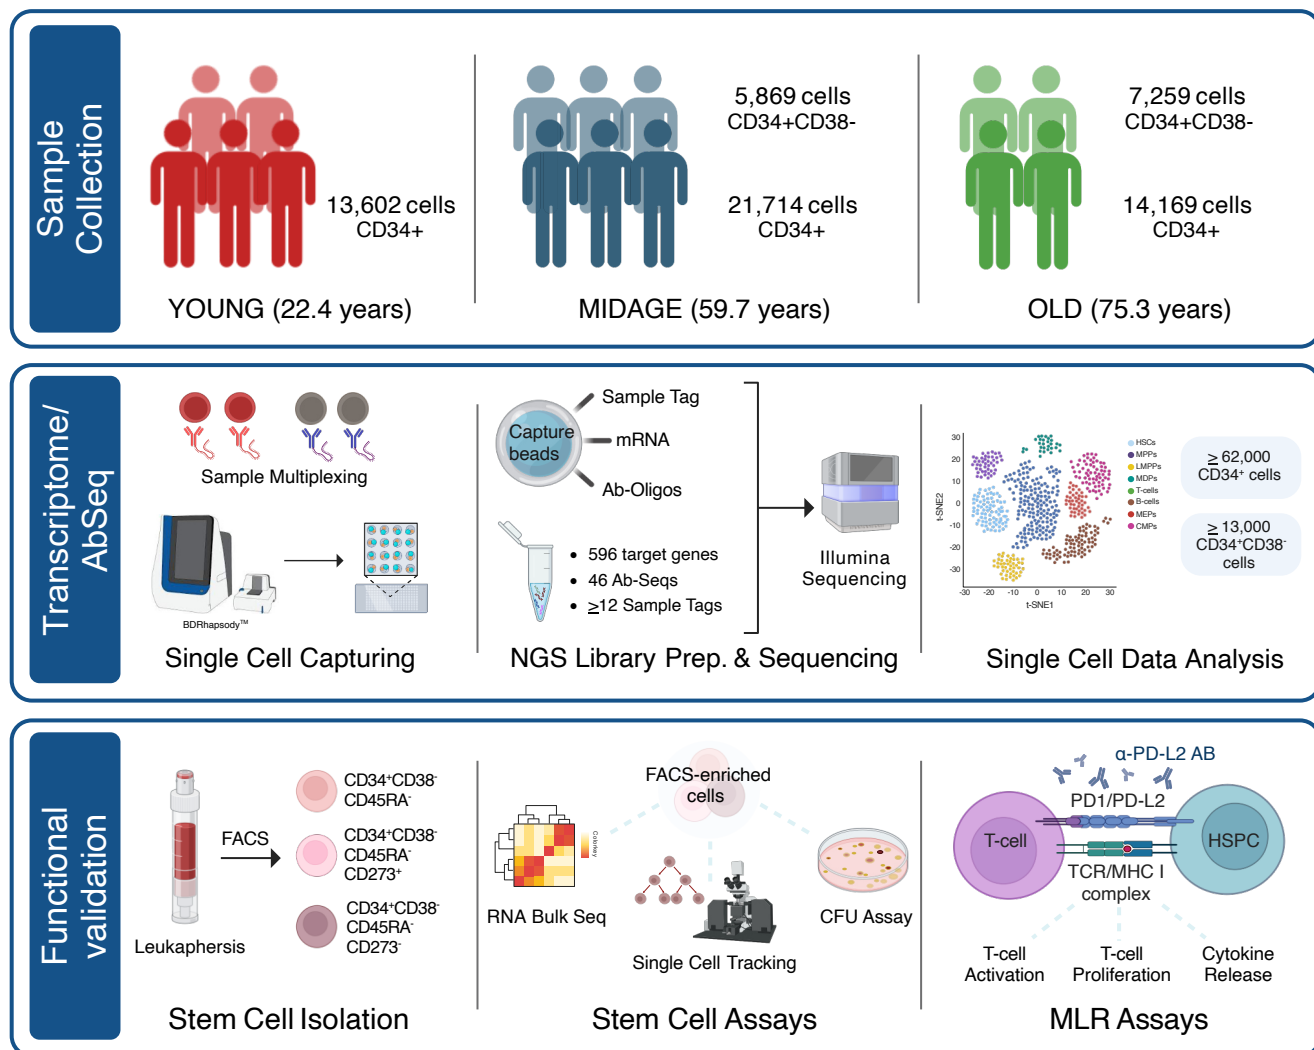

### Supplementary Figure S1. Graphical abstract of the workflow.

HSPCs were isolated from 15 donors of three different age groups (Sample collection). After sample multiplexing and antibody-based sequencing (AbSeq) staining for surface proteins, transcriptome analysis was performed using the BD Rhapsody platform. Transcriptome/AbSeq data analysis was performed on 62,277 cells passing quality control. CD273/PD-L2 was identified to be highly expressed on immature stem cells, and functional validation including the interplay with allogeneic T-cells was performed (Functional validation). Created in BioRender. Rieger, A. (2025) <https://BioRender.com/n82a359>.

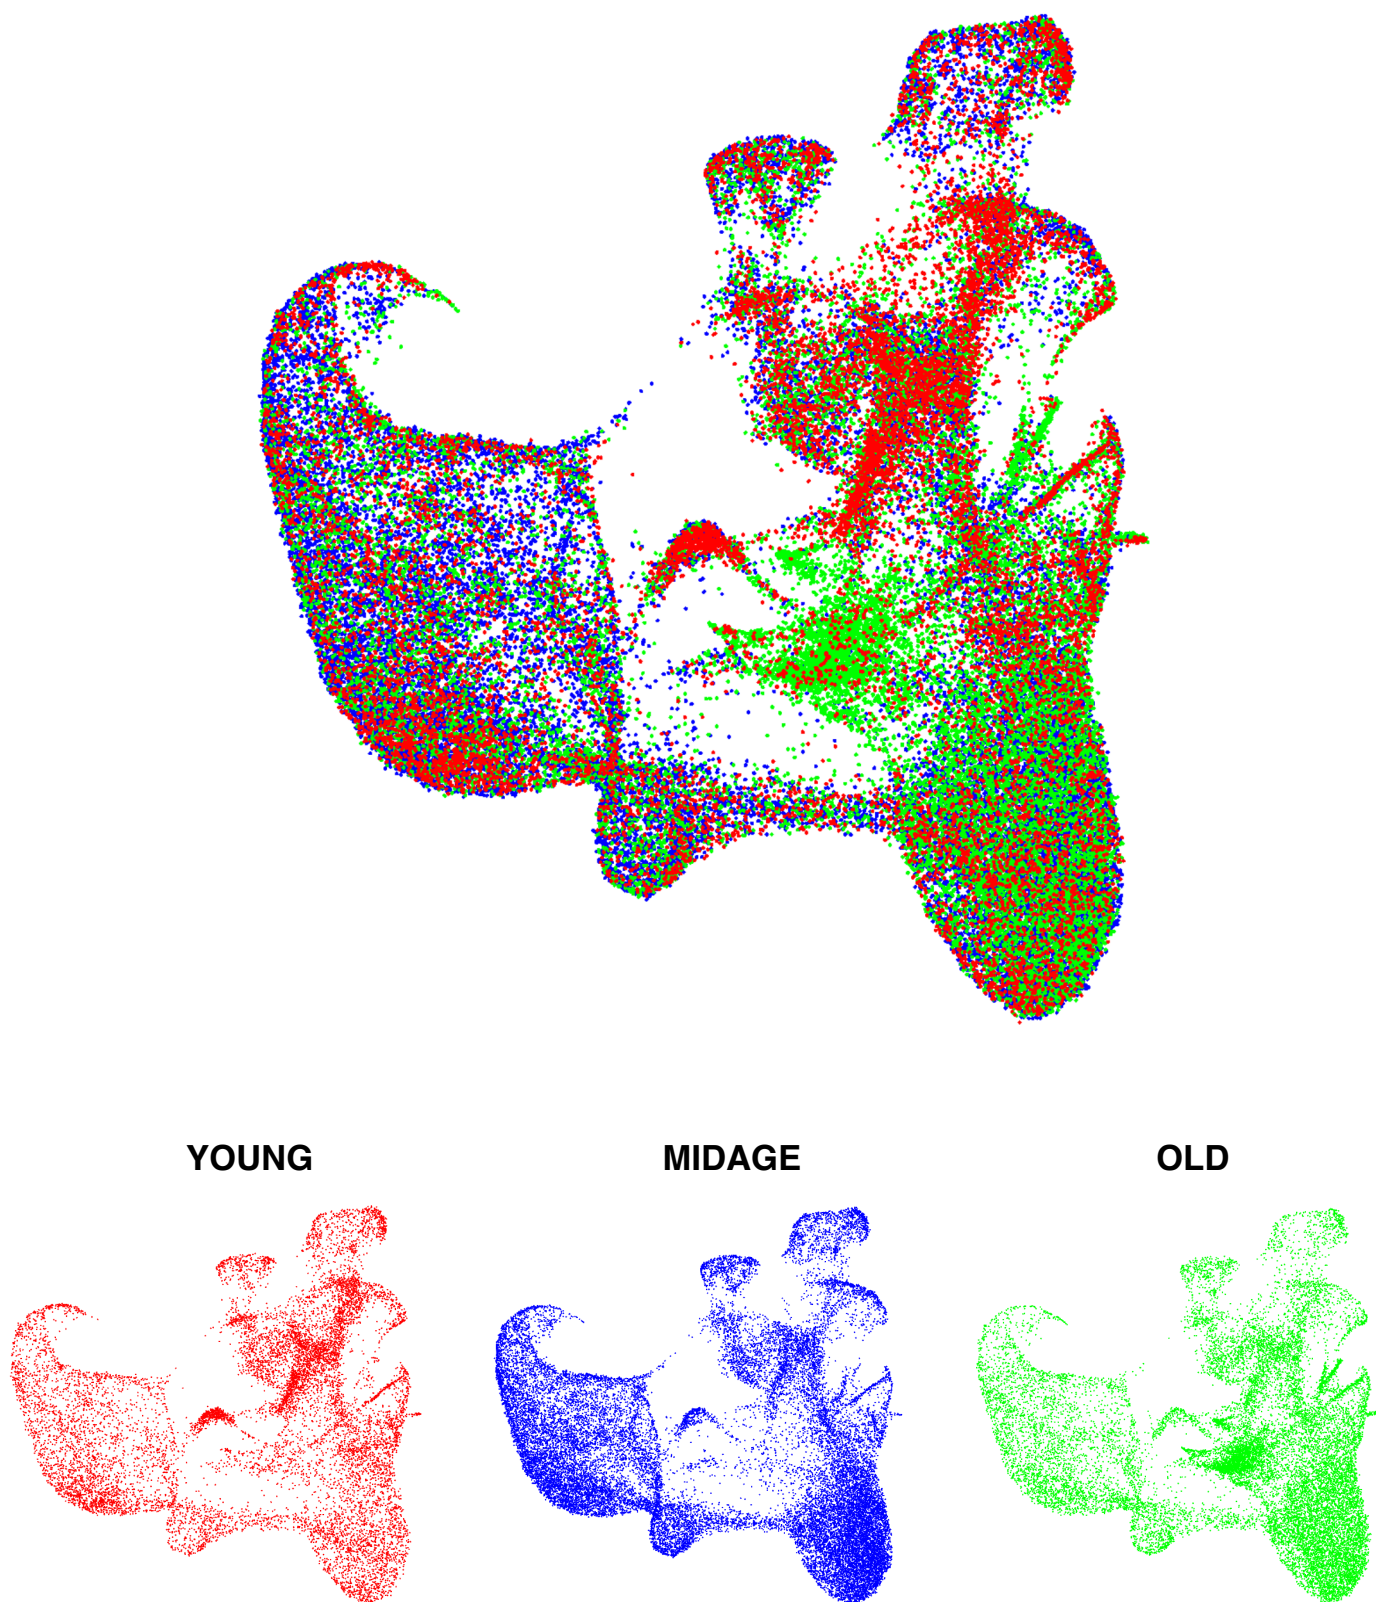

**Supplementary Figure S2. Distribution of CD34+ HSPCs from three age groups after batch effect correction.**

62,277 single cells from 15 donors of three age groups projected on UMAP after CCA batch effect correction. Superimposed and isolated UMAP plots are shown.

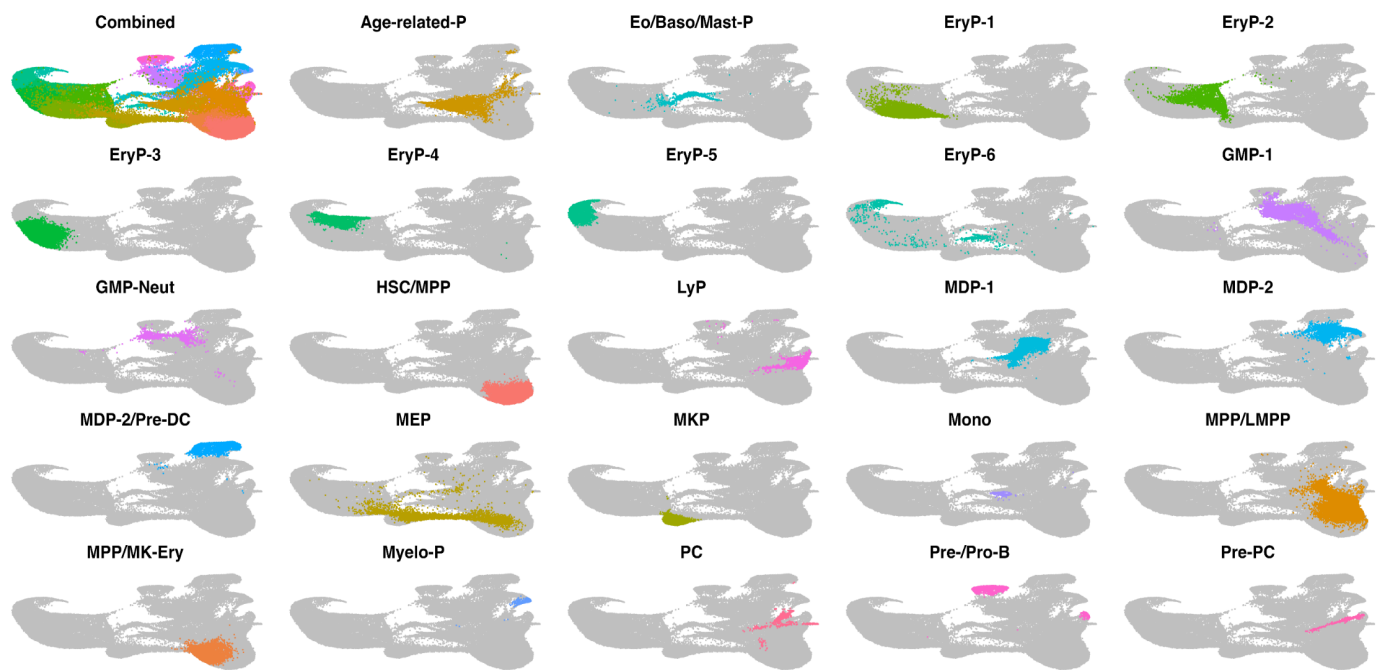

### Supplementary Figure S3. Visualization of individual clusters.

UMAP plots display separated clusters of CD34<sup>+</sup> HSPCs from Figure 1a.

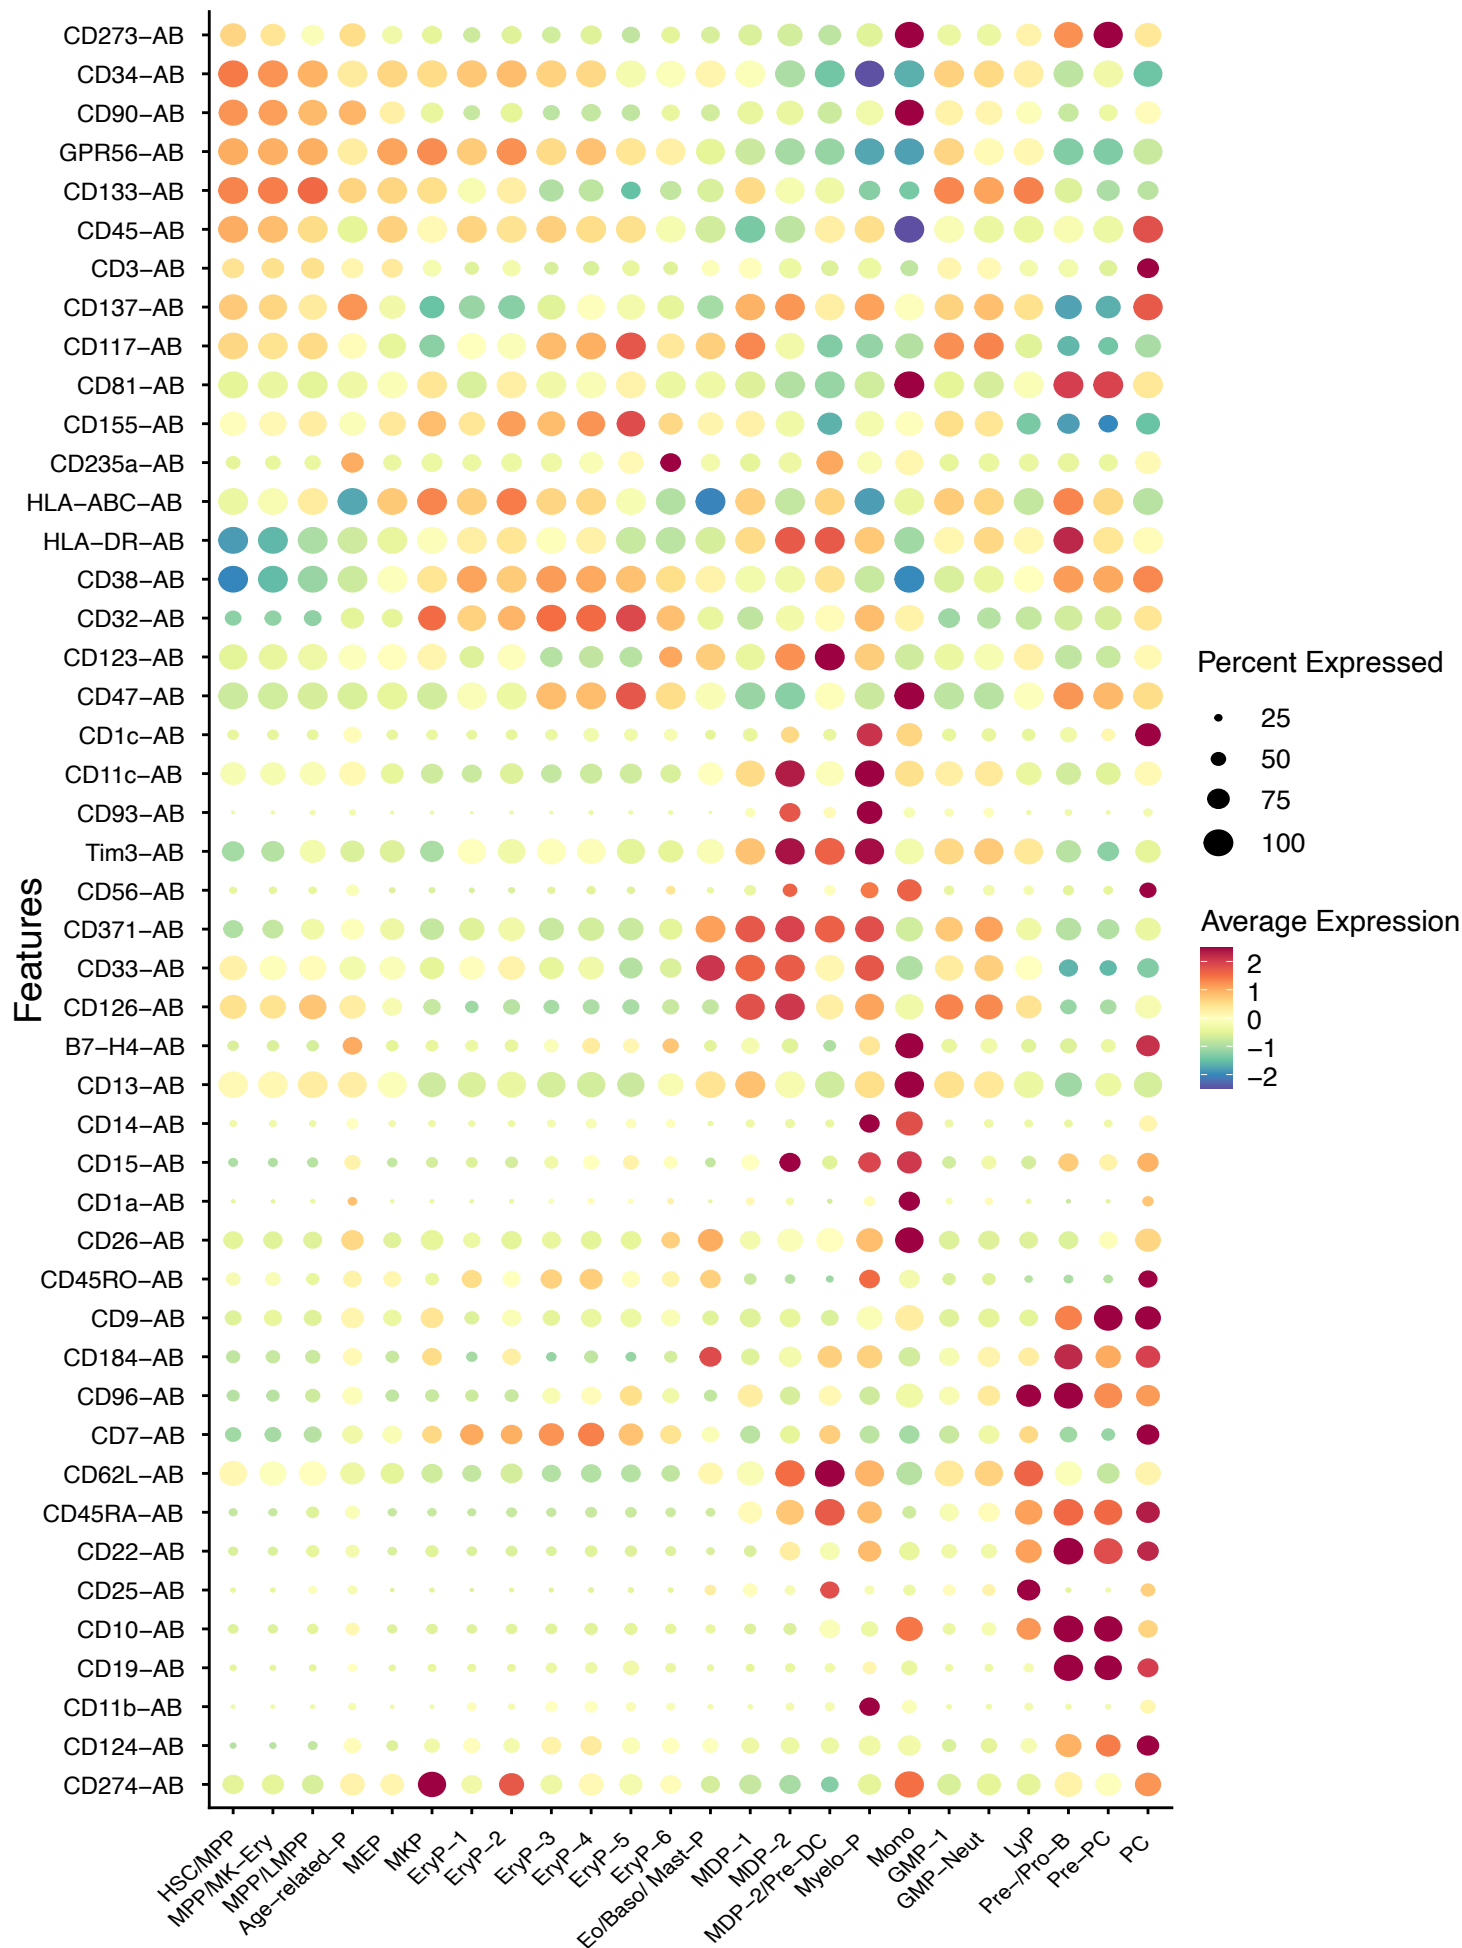

**Supplementary Figure S4. Surface protein expression of CD34<sup>+</sup> HSPC clusters.**

Dot-plot visualization of the surface protein expression of 46 AbSeq markers in UMAP clusters from CD34<sup>+</sup> HSPCs shown in Figure 1a.



**a**

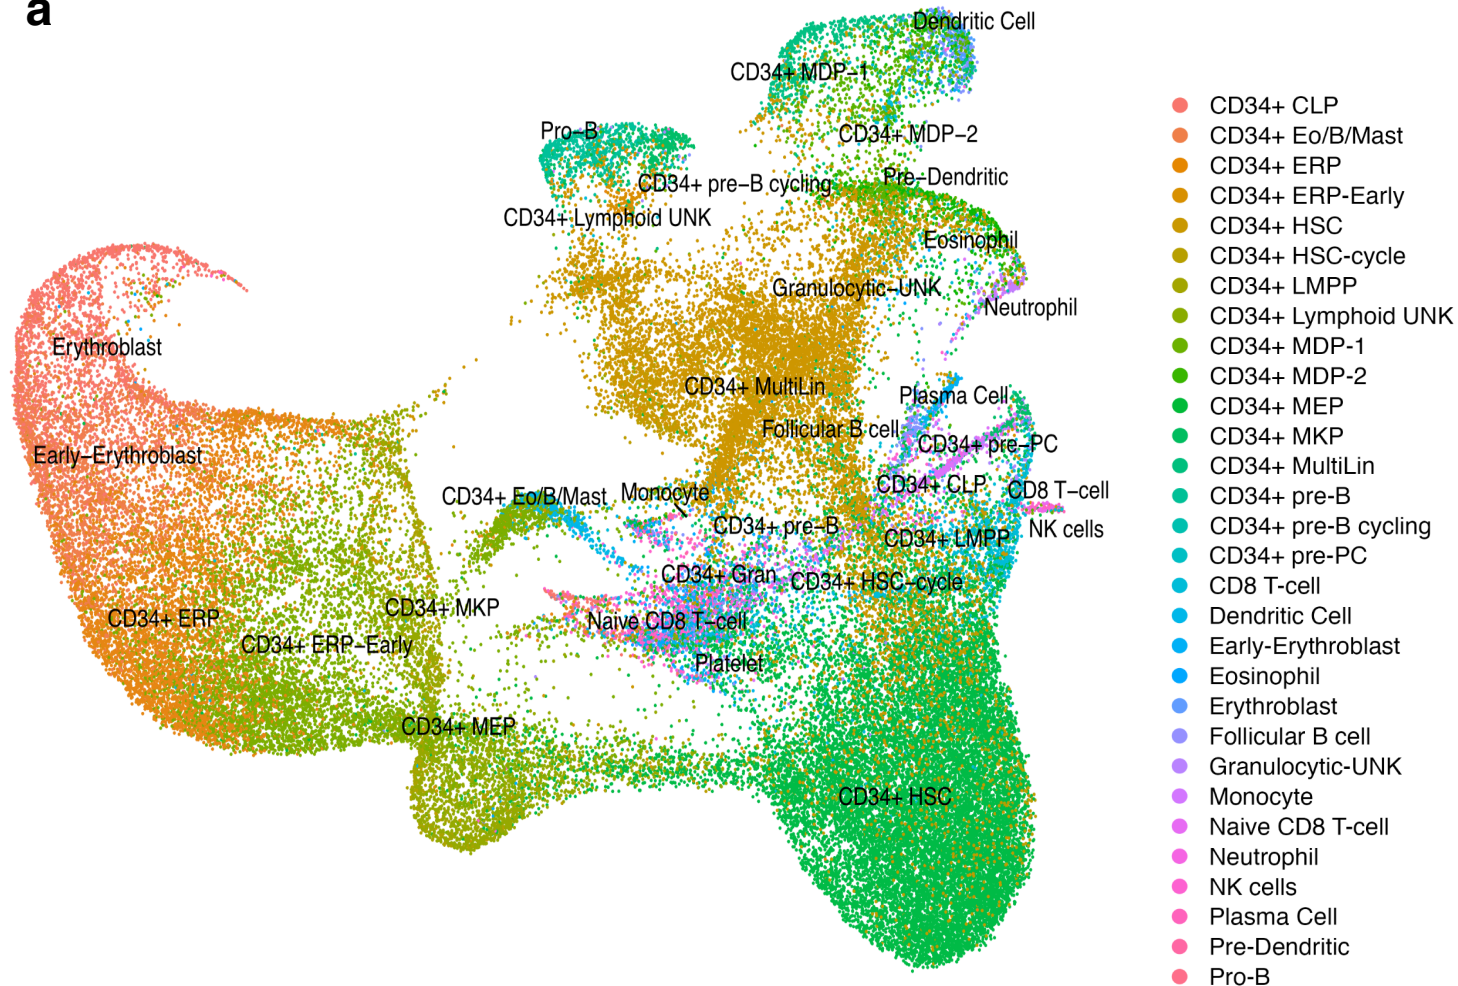**b**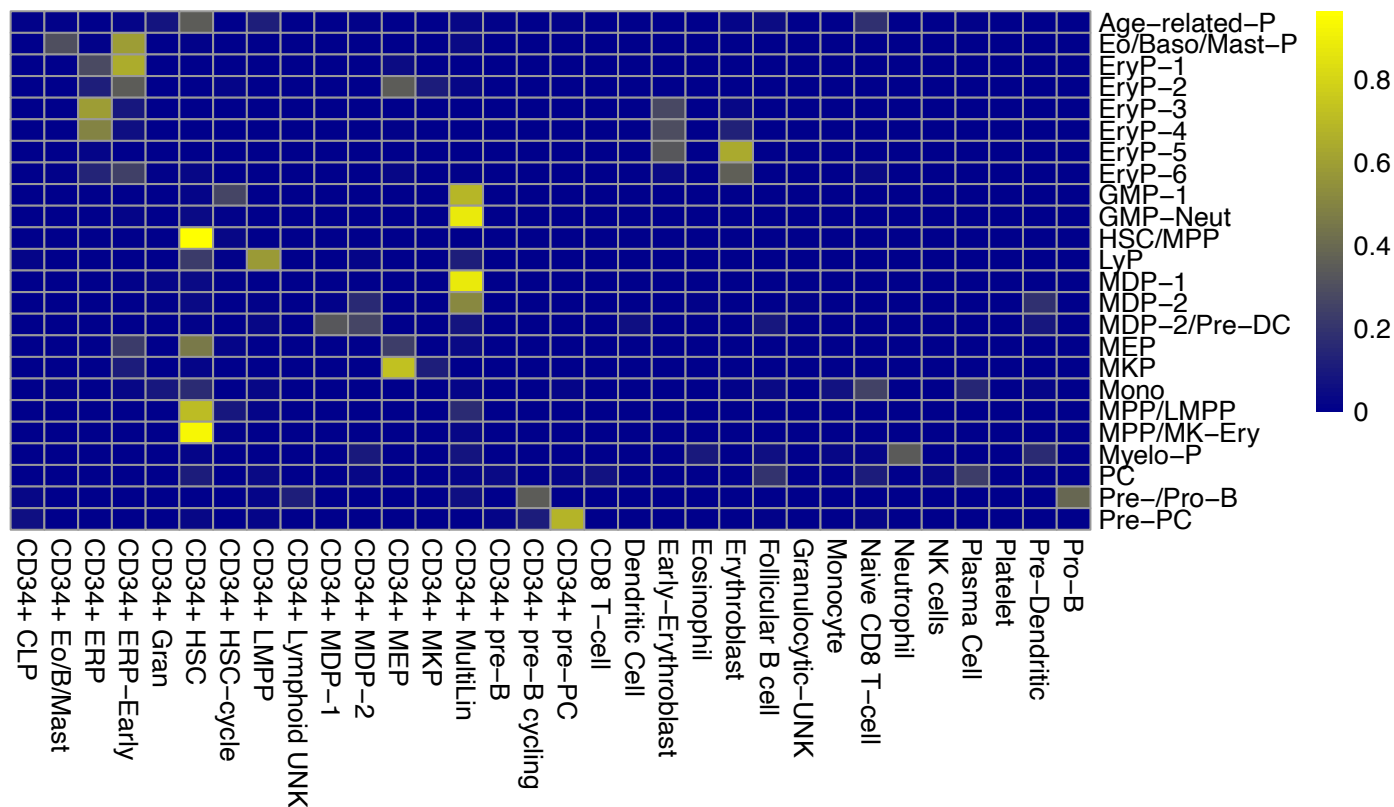

**Supplementary Figure S5. Unsupervised cell type annotation by cell label transfer.** a) Cell label transfer was performed using the published dataset from Triana *et al.* Nat Immunol 2021. b) Correlation matrix: X axis = predicted labels from cell label transfer, Y-axis = our manual annotation

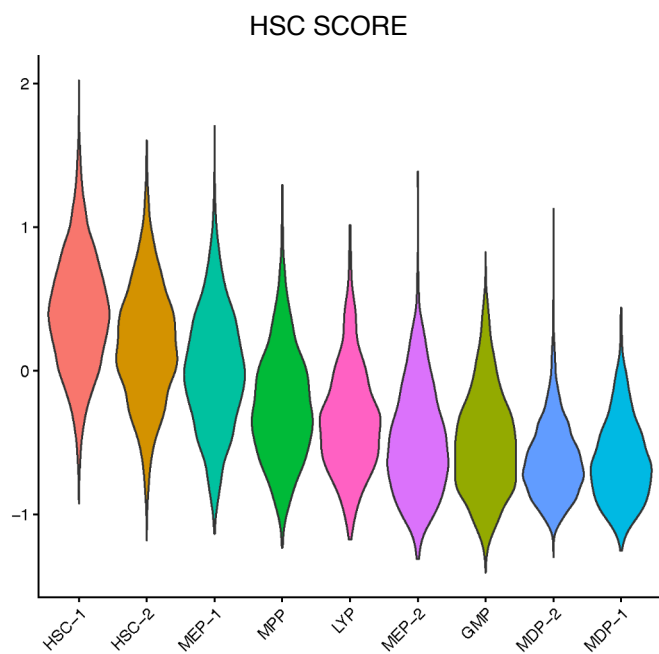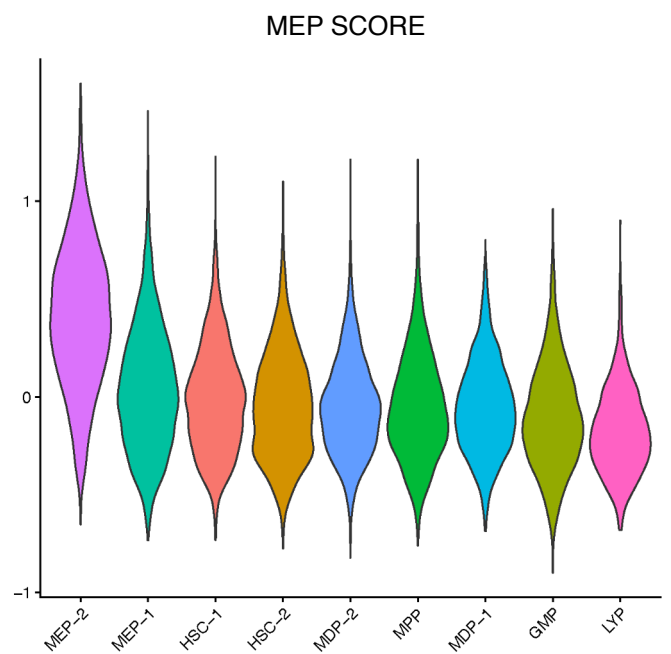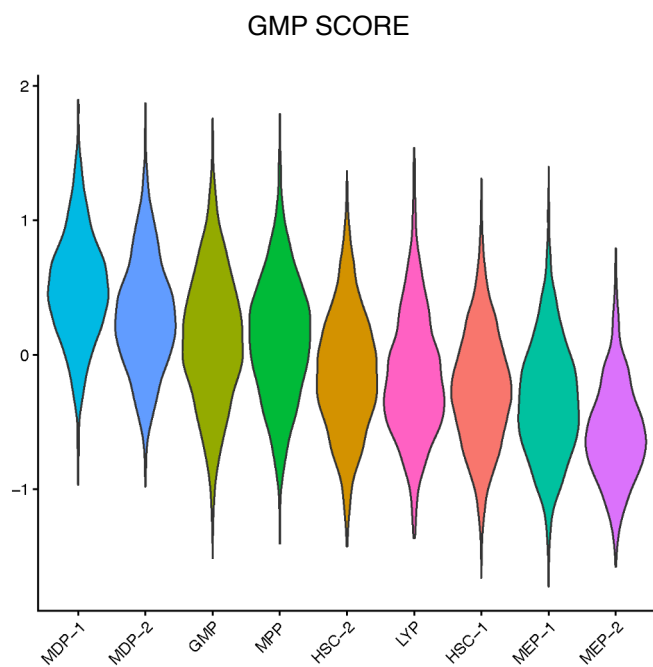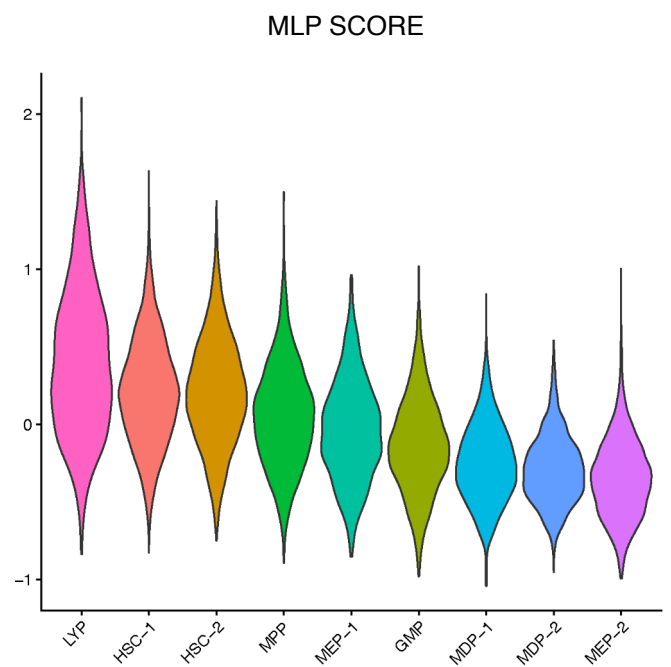

**Supplementary Figure S6. Cell population scores of clusters from immature HSPCs.**

Violin plots showing HSC and progenitor cell scores calculated for each cell analyzed in the re-clustered immature population (n = 21,395 cells) shown in Figure 2a using the published gene sets by Mende *et al.* Blood 2022.

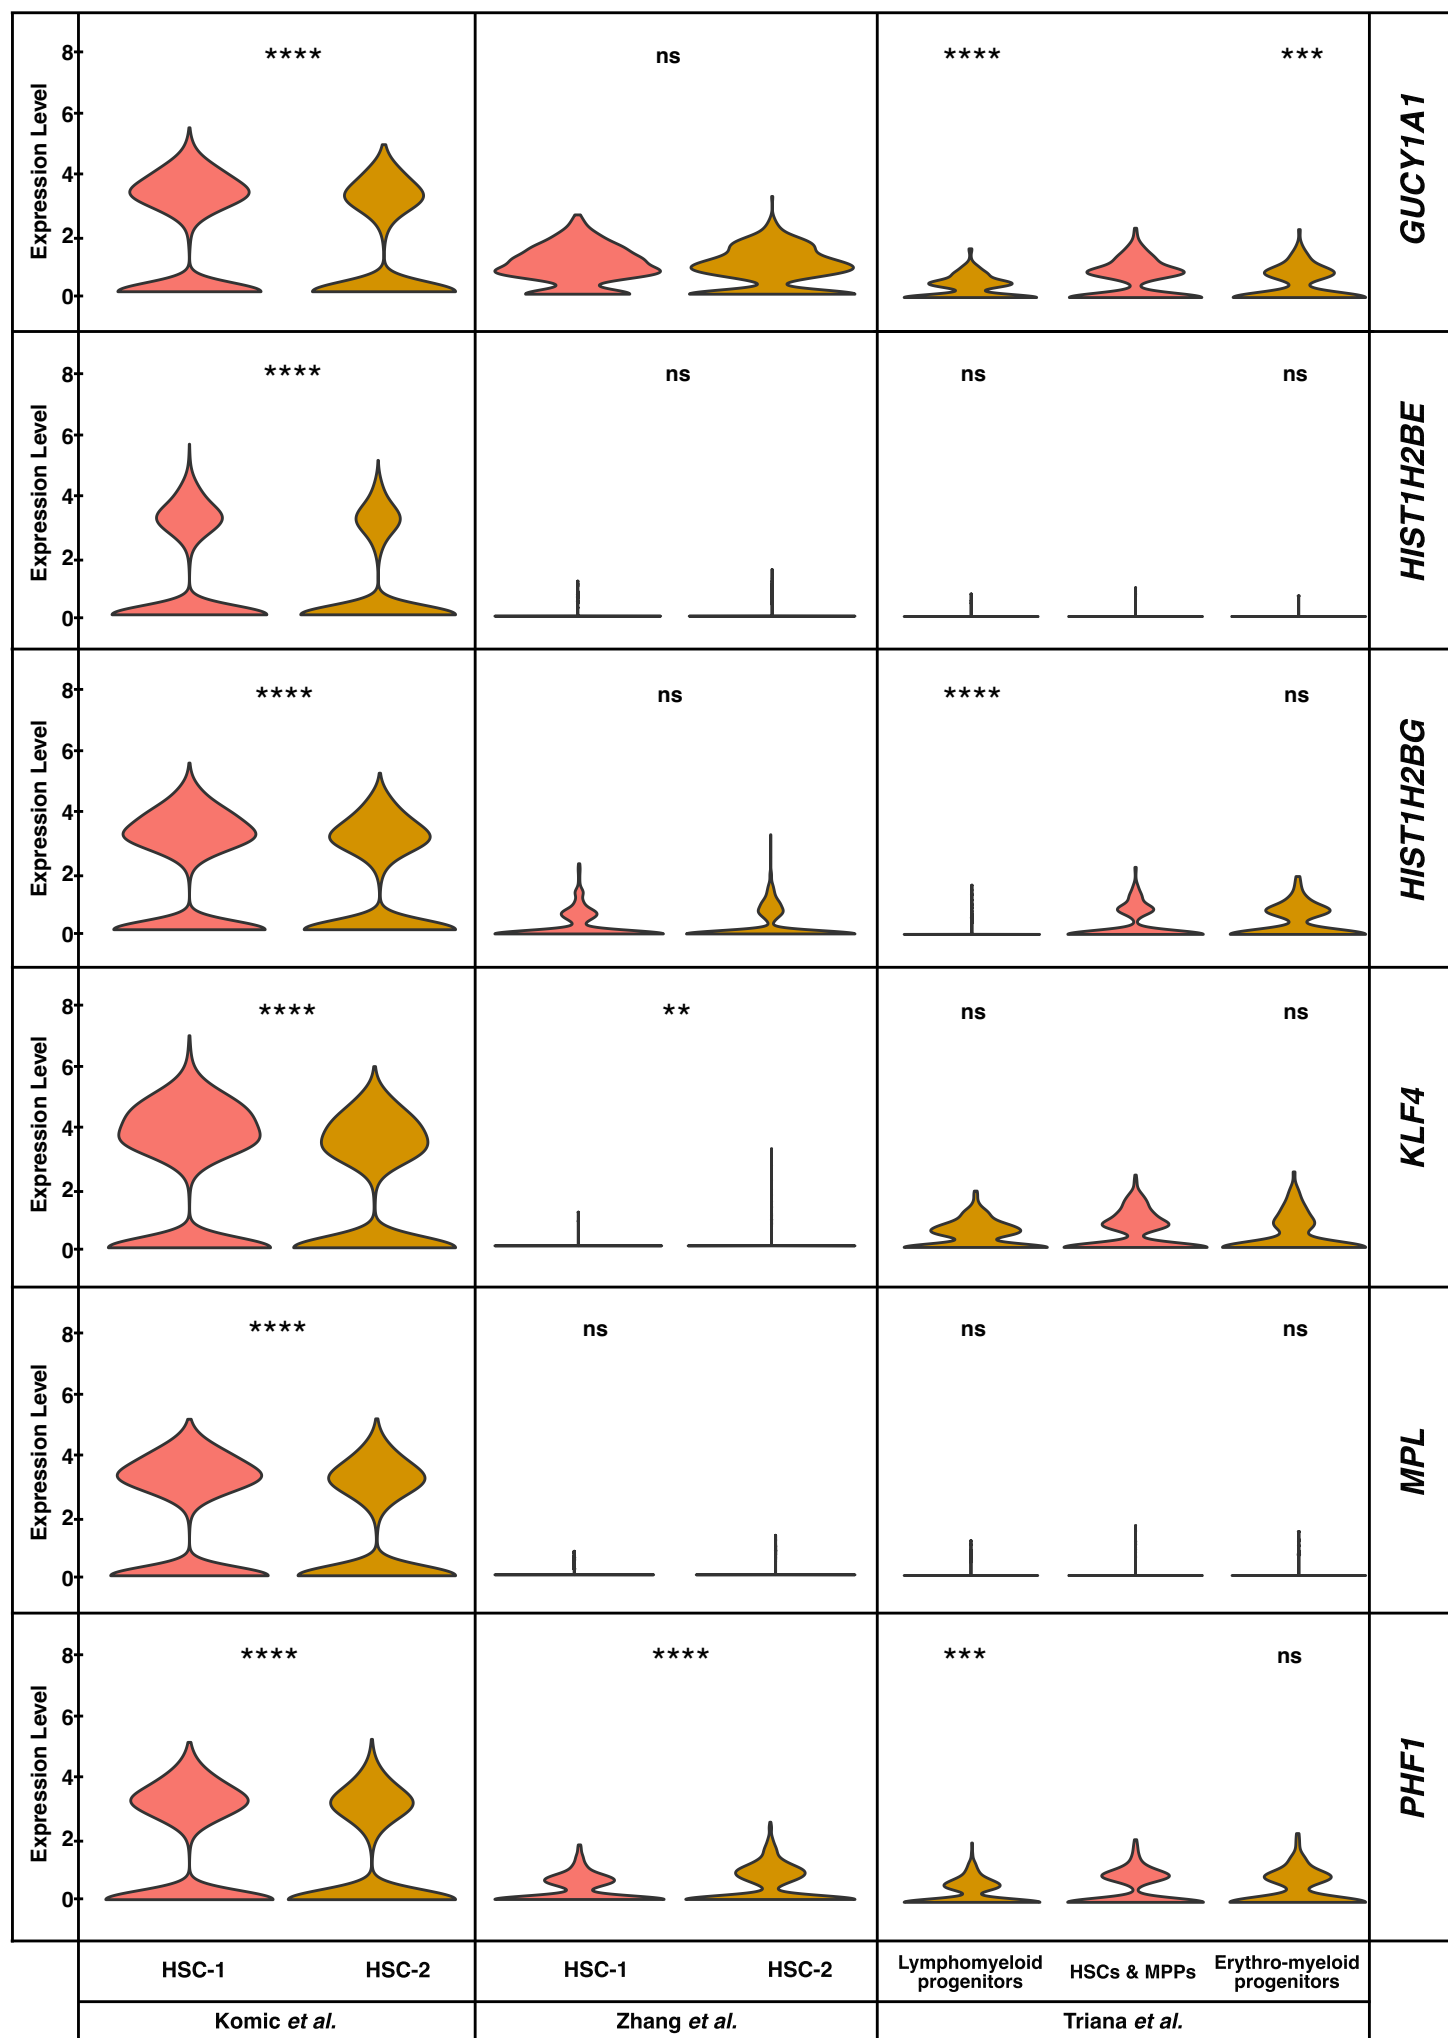

**Supplementary Figure S7. Gene expression of HSPC genes identified in our study (Komic *et al.*) and confirmed/compared to the studies of Zhang *et al.* and Triana *et al.* Statistics was calculated by Wilcoxon Rank Sum test; \*\*,  $p < 0.01$ ; \*\*\*,  $p < 0.001$ ; \*\*\*\*,  $p < 0.0001$ ; ns, not significant.**

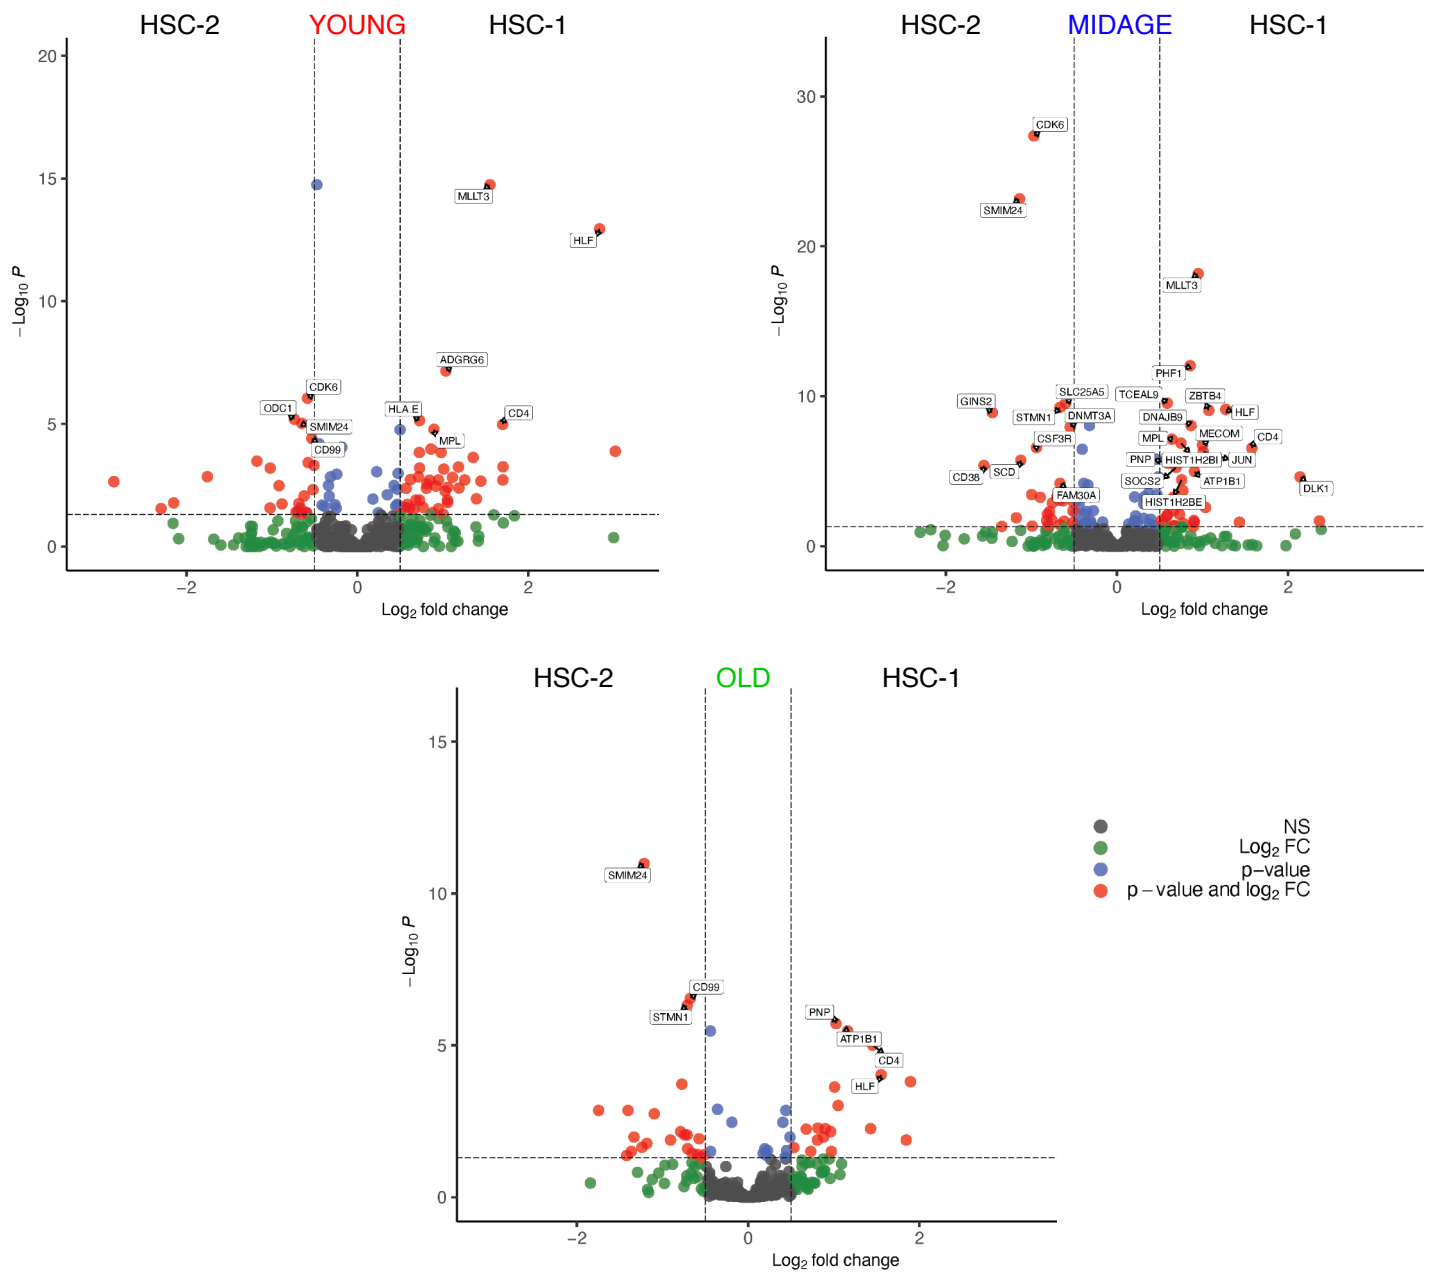

### Supplementary Figure S8. Differential gene expression of HSC-1 and HSC-2 cells according to age.

Volcano plots depict the results of DESeq2 analysis on pseudobulk data, comparing HSC-1 and HSC-2 cluster cells, within each age group. A detailed gene list is shown in Supplementary Tables 9-11.



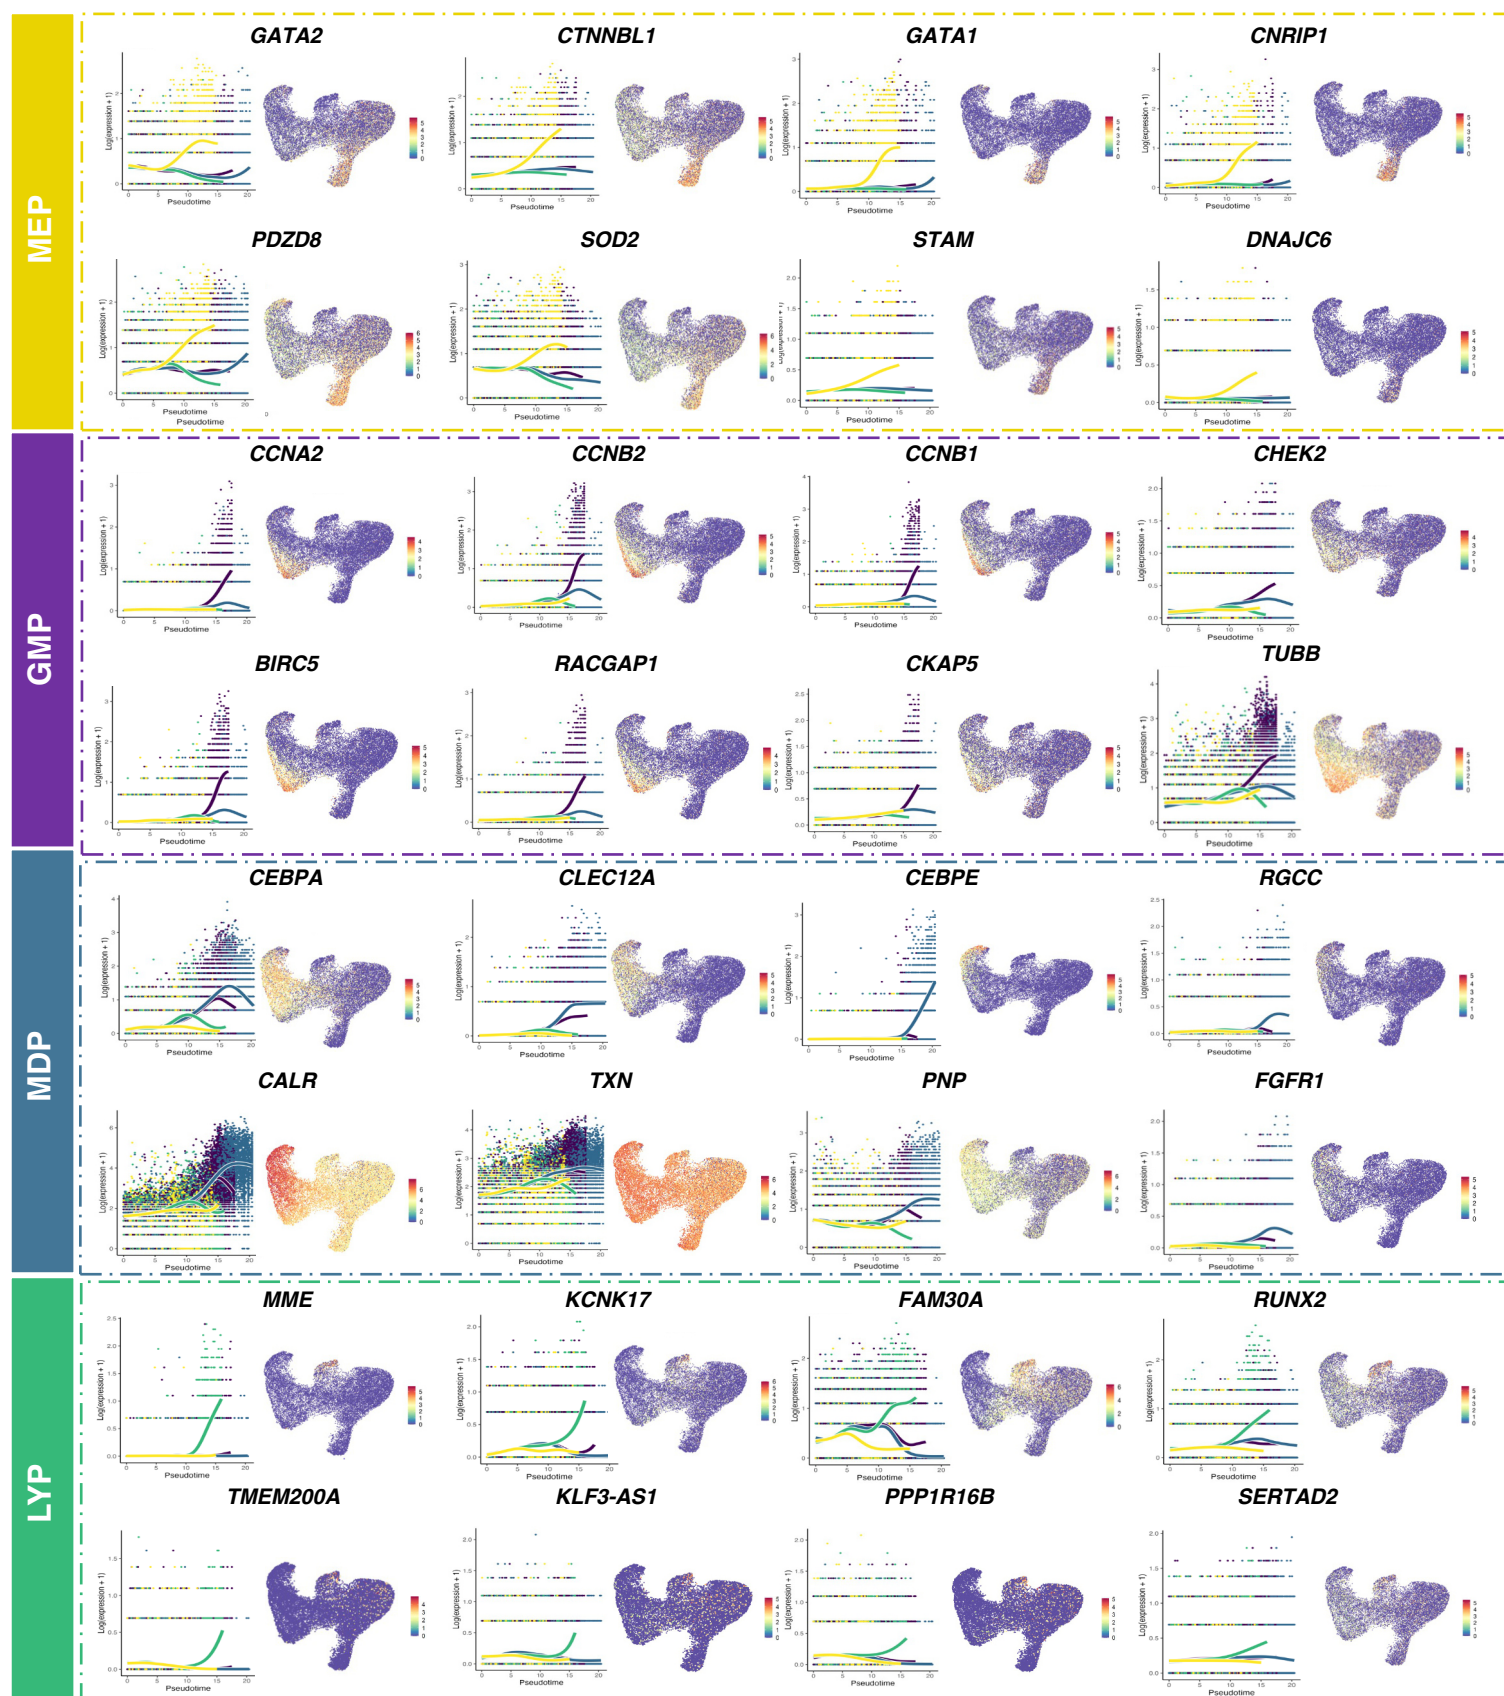

**Supplementary Figure S9. Continuous representation of gene expression by tradeSeq regression model based on lineage trajectories.**

Showcases genes that are specifically expressed in one trajectory: MKP/ERP (yellow), GMP (violet), MDP (blue) and LYP (green). An extended list of genes is provided in the Supplementary Material.



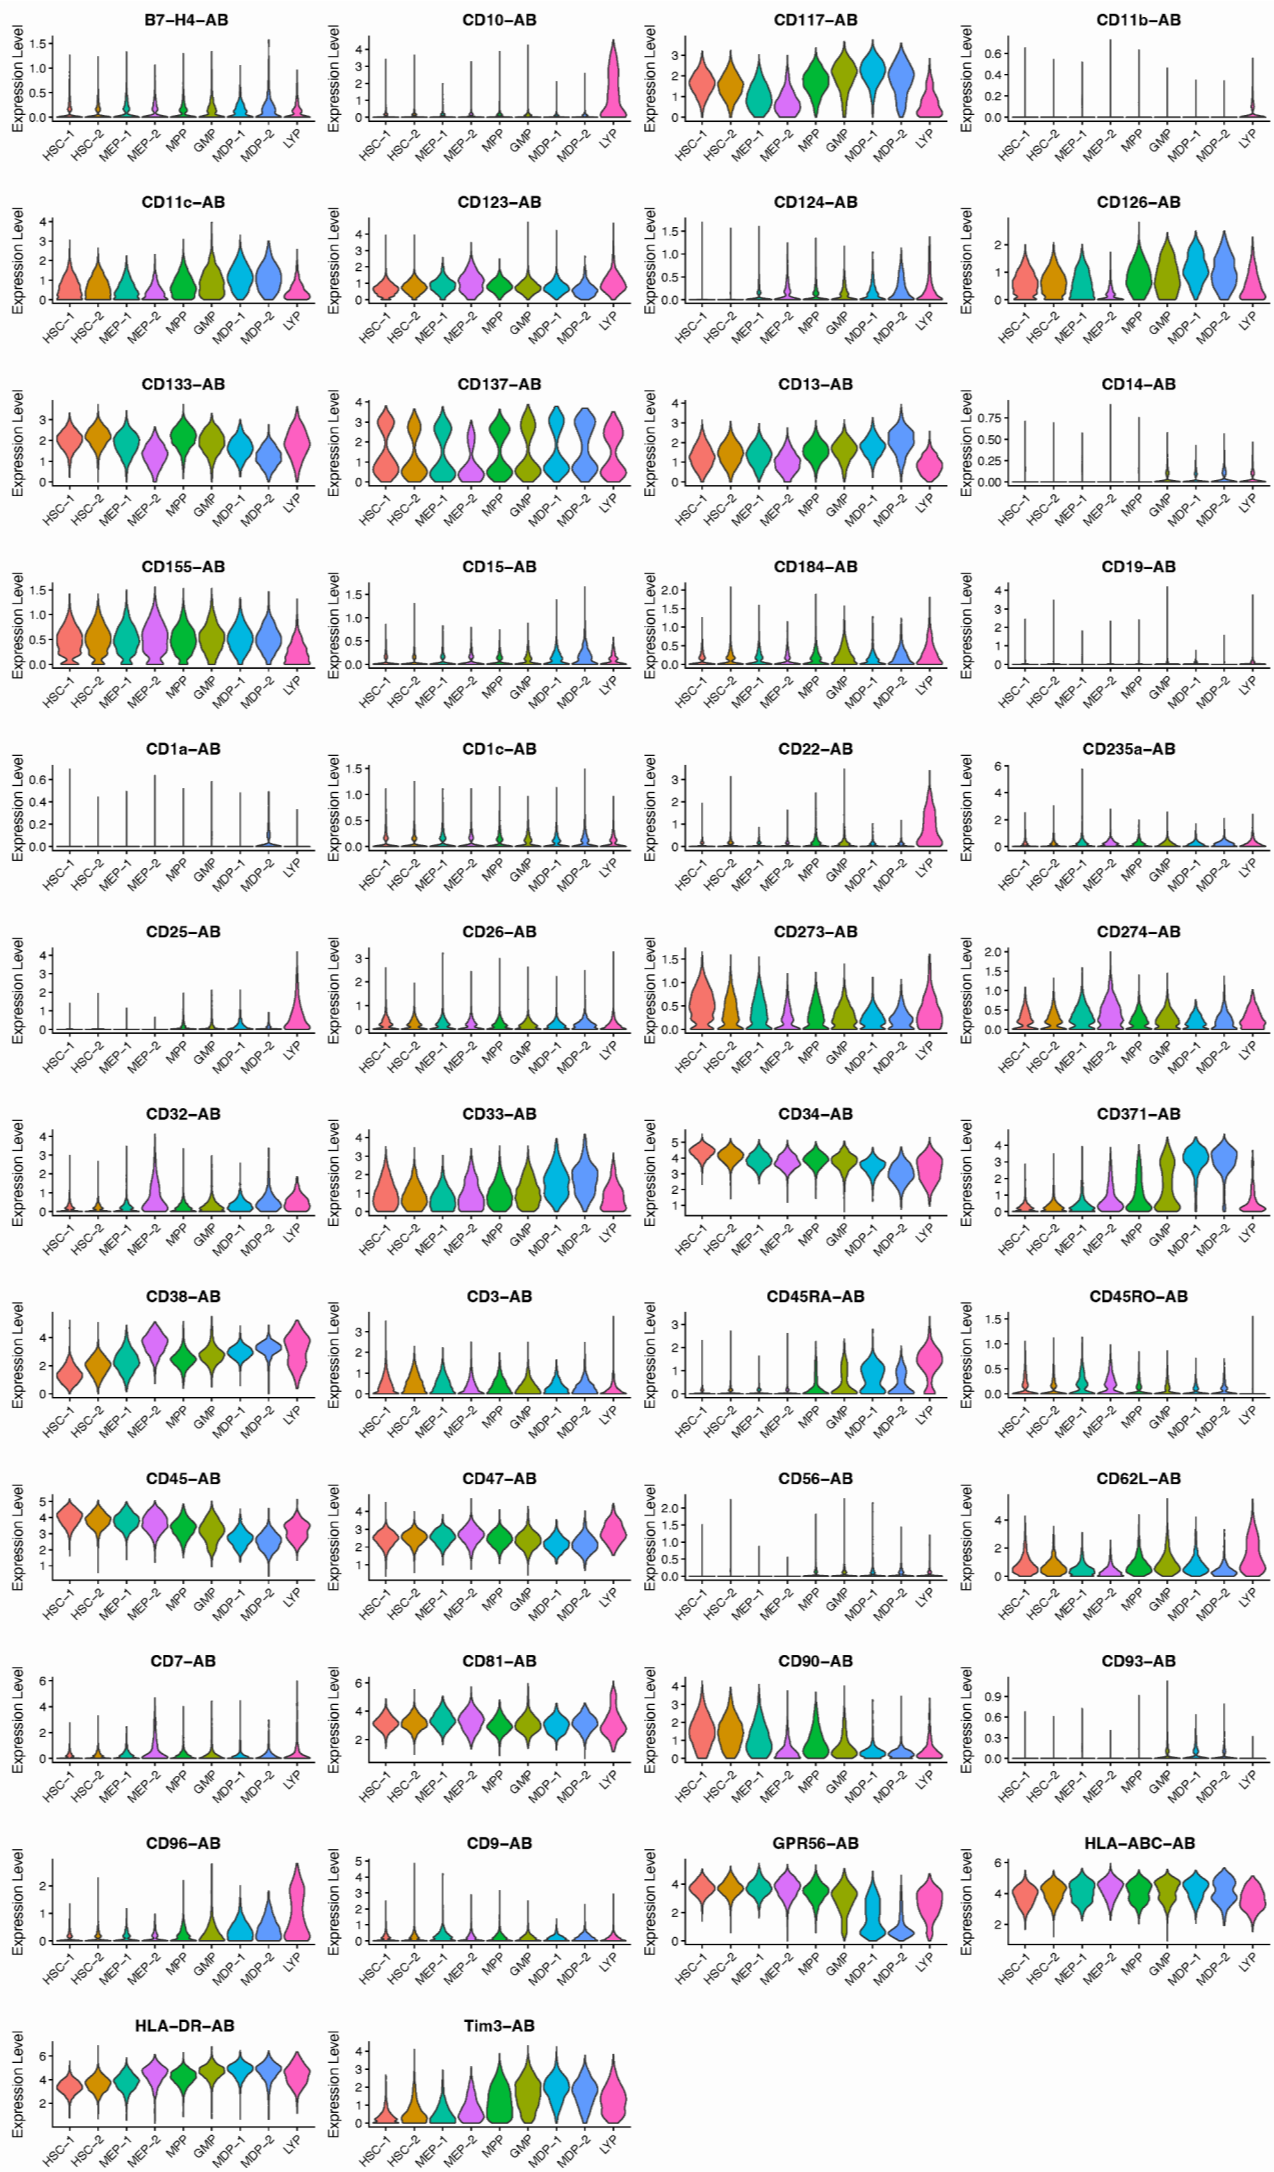

**Supplementary Figure S10. Surface protein expression of immature HSPC clusters.** Violin-plot visualization of the surface protein expression of 46 AbSeq markers in UMAP clusters from re-clustered immature HSPCs shown in Figure 2a.

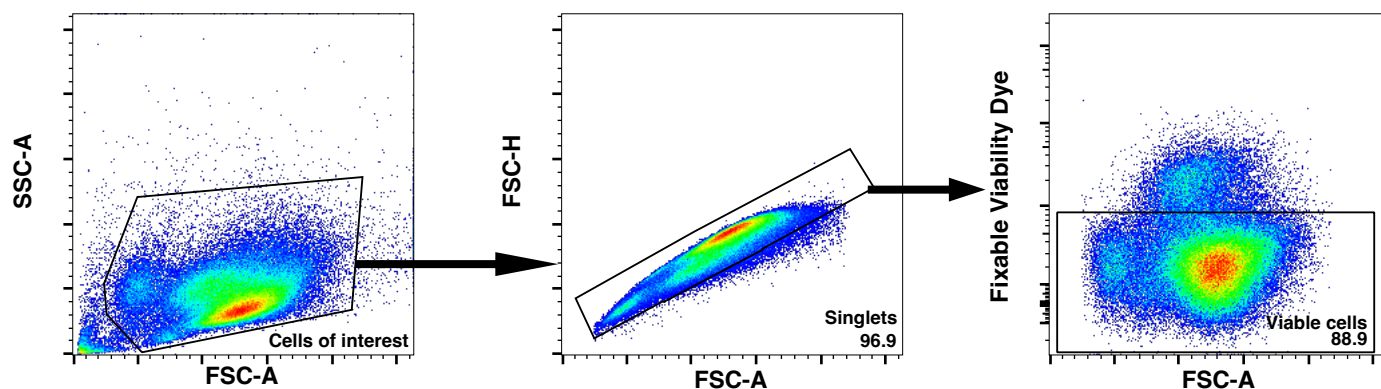

**Supplementary Figure S11. Gating strategy to enrich for viable singlet cells in flow cytometry analysis.**

All samples were first gated using FSC-A/SSC-A to exclude debris, followed by FSC-H/FSC-A to identify singlet cells and by using a fixable viability dye to exclude dead cells. The displayed example represents CD34 MACS-enriched mPB. All relevant subsequent gating strategies are shown in the main or supplementary figures.

**a**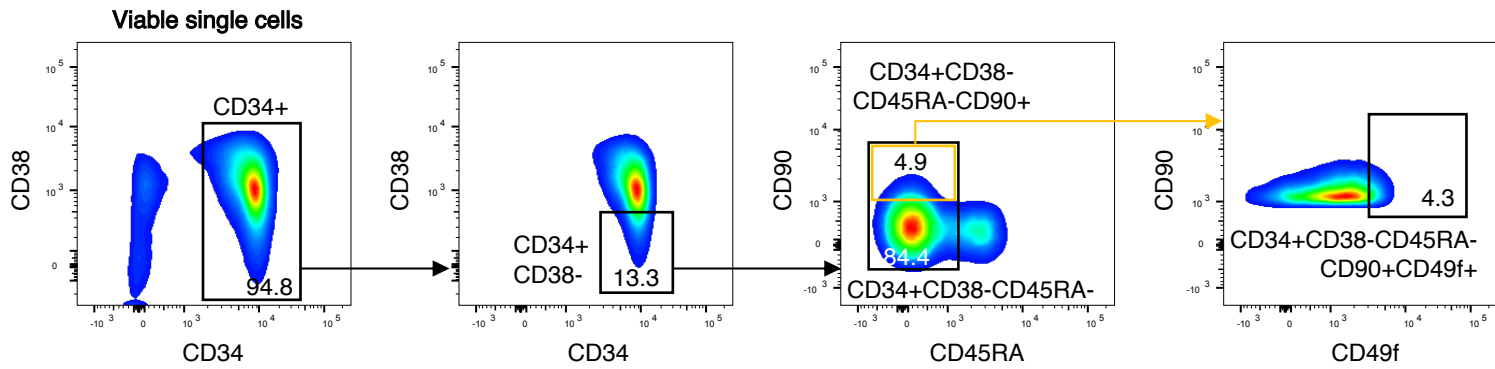**b**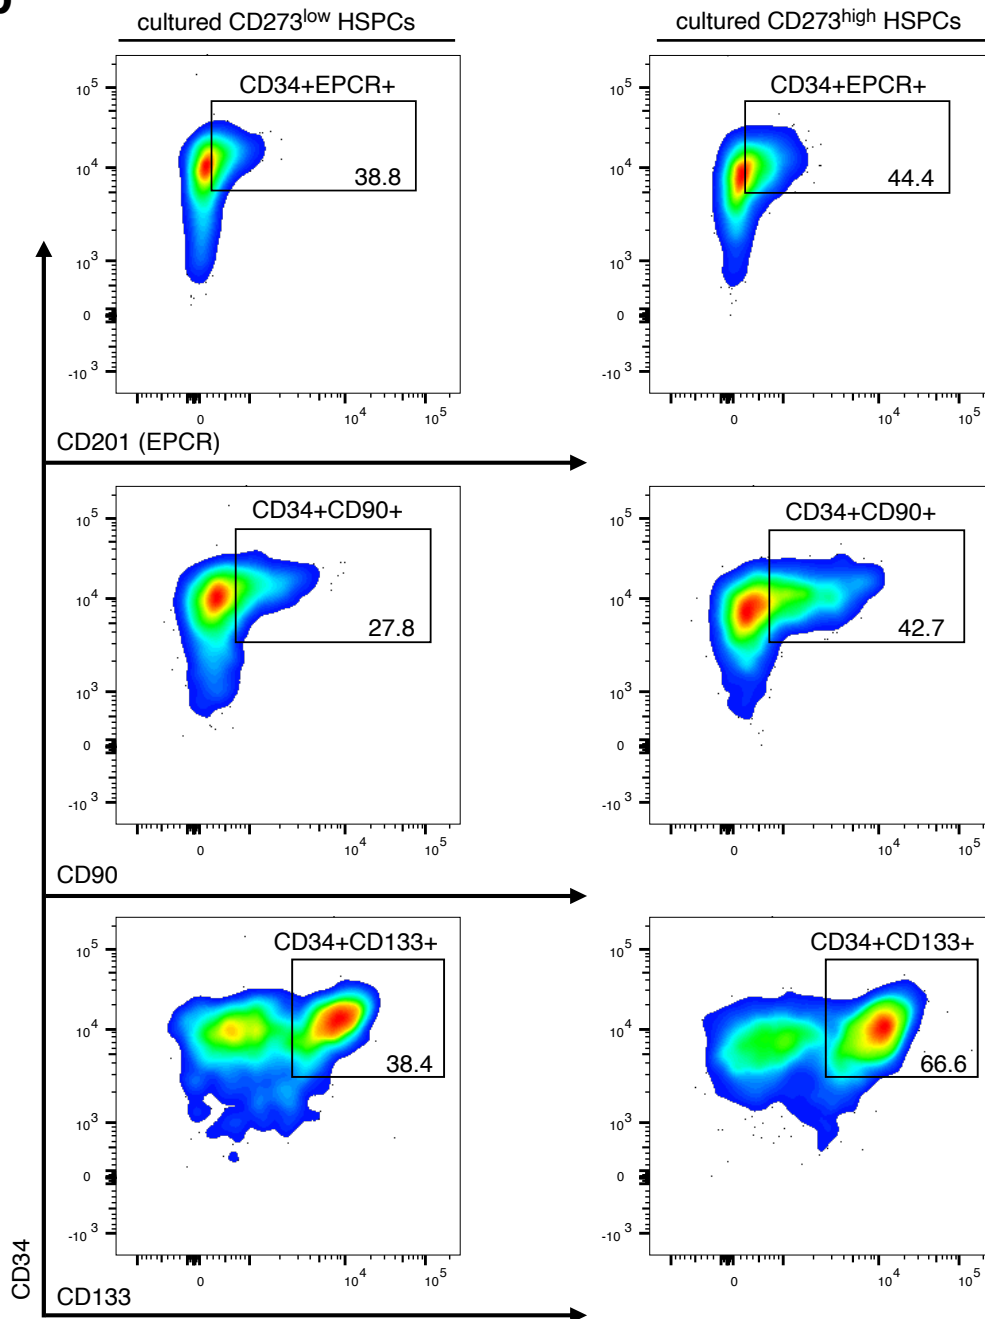

**Supplementary Figure S12. FACS gating of HSPC populations in functional analyses.**

a) Representative flow cytometry plots for analyzing CD273 expression levels on defined HSPC subpopulations with their percentages. b) Representative plots of *in vitro*-cultured CD273<sup>low</sup> and CD273<sup>high</sup> sorted HSPCs. Gates show CD34+ cells with expression of CD201(EPCR), CD90 and CD133 and their percentages.

**a**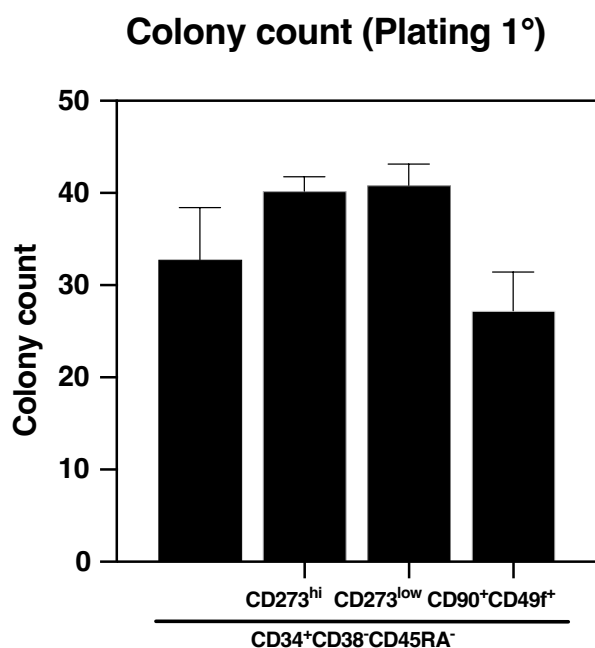**b**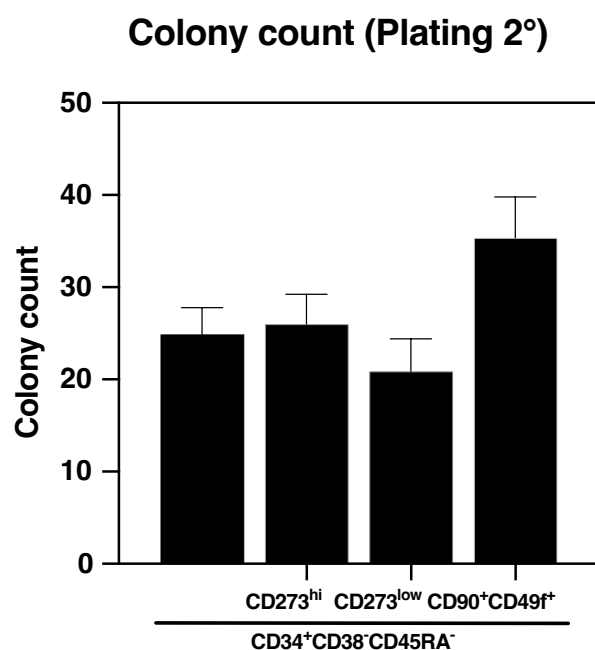

**Supplementary Figure S13. Number of colonies determined by colony-forming unit assay (CFU).**

a) FACS-sorted cells of indicated subpopulations after 14 days of culture. b) Replating of primary CFU and colony scoring after 14 days.



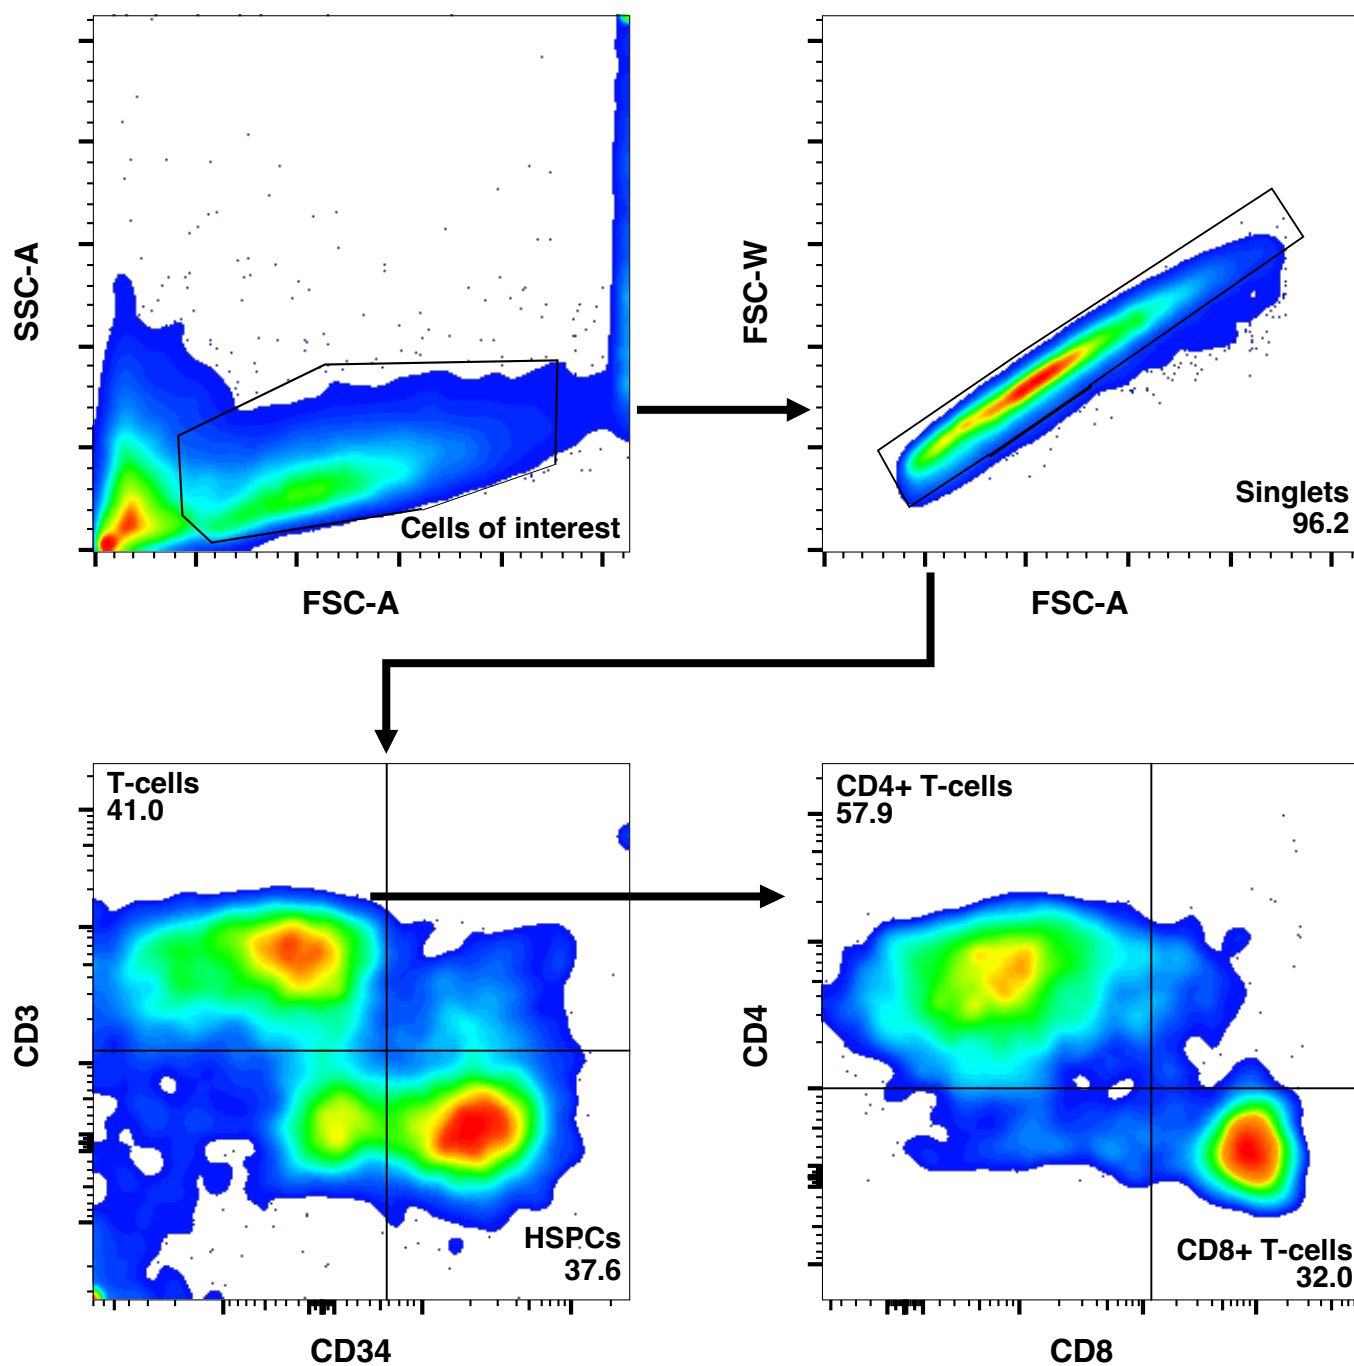

**Supplementary Figure S14. Gating strategy for T-cells in co-culture experiments.**

All samples were FSC-A and SSC-A gated for debris exclusion, followed by FSC-W/FSC-A gating to select singlet cells. T-cells were distinguished from HSPCs by CD3 expression. Subsets of T-cells were gated based on CD4 or CD8 expression.

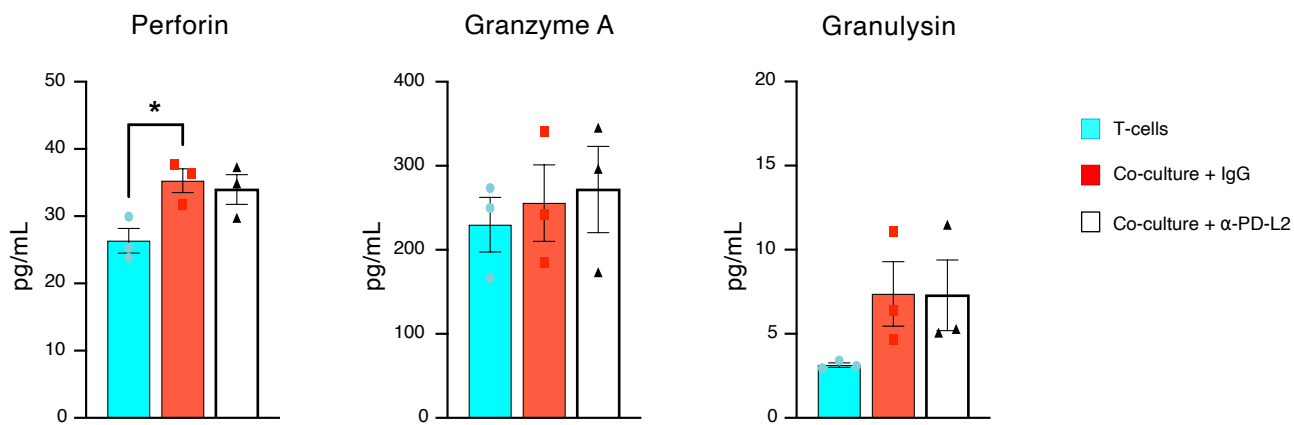

### Supplementary Figure S15. Cytokine release of co-culture of allogeneic HSPCs and T-cells.

T-cells were co-cultured with allogeneic HSPCs in the presence of either PD-L2 blocking antibody (black) or an isotype control antibody (red) for 72 h, and compared to a T-cell mono-culture (blue). Cytokine-bead array assay of co-culture and T-cell mono-culture supernatants (n=3). ANOVA with Tukey's multiple comparisons test. Bars represent the mean with SEM. \*,  $p < 0.05$ .

### References

- Mende, N. et al. Unique molecular and functional features of extramedullary hematopoietic stem and progenitor cell reservoirs in humans. *Blood* 139, 3387–3401; 10.1182/blood.2021013450 (2022).
- Triana, S. et al. Single-cell proteo-genomic reference maps of the hematopoietic system enable the purification and massive profiling of precisely defined cell states. *Nature immunology* 22, 1577–1589; 10.1038/s41590-021-01059-0 (2021).
- Zhang, X. et al. An immunophenotype-coupled transcriptomic atlas of human hematopoietic progenitors. *Nature Immunology* 25, 703–715; 10.1038/s41590-024-01782-4 (2024).
